# Supplementary material for: Digital health tools for the passive monitoring of depression: a systematic review of methods
Source: Springer Nature journal article supplement (doi:10.1038/s41746-021-00548-8), 2022-01-11
Supplement: MOESM1 [file 41746_2021_548_MOESM1_ESM.pdf]

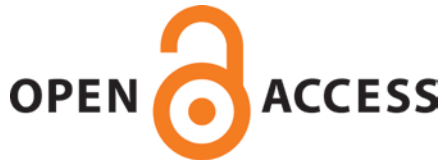

## King's Research Portal

DOI:

[10.1038/s41746-021-00548-8](https://doi.org/10.1038/s41746-021-00548-8)

*Document Version*

Other version

[Link to publication record in King's Research Portal](#)

*Citation for published version (APA):*

De Angel, V., Lewis, S., White, K., Oetzmann, C., Leightley, D., Oprea, E., Lavelle, G., Matcham, F., Pace, A., Mohr, D. C., Dobson, R., & Hotopf, M. (2022). Digital health tools for the passive monitoring of depression: a systematic review of methods. *npj Digital Medicine*, 5(1), Article 3. <https://doi.org/10.1038/s41746-021-00548-8>

### **Citing this paper**

Please note that where the full-text provided on King's Research Portal is the Author Accepted Manuscript or Post-Print version this may differ from the final Published version. If citing, it is advised that you check and use the publisher's definitive version for pagination, volume/issue, and date of publication details. And where the final published version is provided on the Research Portal, if citing you are again advised to check the publisher's website for any subsequent corrections.

### **General rights**

Copyright and moral rights for the publications made accessible in the Research Portal are retained by the authors and/or other copyright owners and it is a condition of accessing publications that users recognize and abide by the legal requirements associated with these rights.

- Users may download and print one copy of any publication from the Research Portal for the purpose of private study or research.
- You may not further distribute the material or use it for any profit-making activity or commercial gain
- You may freely distribute the URL identifying the publication in the Research Portal

### **Take down policy**

If you believe that this document breaches copyright please contact [librarypure@kcl.ac.uk](mailto:librarypure@kcl.ac.uk) providing details, and we will remove access to the work immediately and investigate your claim.

# Digital Health Tools for the Passive Monitoring of Depression: A Systematic Review of Methods

*Valeria De Angel\* MSc<sup>1,2</sup>, Serena Lewis BSc<sup>1,3</sup>, Katie White BSc<sup>1</sup>, Carolin Oetzmann MSc<sup>1</sup>, Daniel Leightley PhD<sup>1</sup>, Emanuela Oprea MSc<sup>1</sup>, Grace Lavelle PhD<sup>1</sup>, Faith Matcham PhD<sup>1</sup>, Alice Pace BSc<sup>4</sup>, David C Mohr PhD<sup>5,6</sup>, Richard Dobson PhD<sup>2,7</sup>, Matthew Hotopf PhD<sup>1,2</sup>*

1. Institute of Psychiatry, Psychology and Neuroscience, King's College London, London, UK
2. NIHR Maudsley Biomedical Research Centre, South London and Maudsley NHS Foundation Trust, London, UK
3. Department of Psychology, University of Bath, Bath, UK
4. Chelsea And Westminster Hospital NHS Foundation Trust
5. Center for Behavioral Intervention Technologies, Northwestern University, Feinberg School of Medicine, Chicago, IL, USA
6. Department of Preventive Medicine, Northwestern University, Feinberg School of Medicine, Chicago, IL, USA
7. Department of Biostatistics and Health Informatics, Institute of Psychiatry, Psychology and Neuroscience (IoPPN), King's College London, 16 De Crespigny Park, London, SE5 8AF, UK

\* Corresponding Author contact details:

E3.08, 3rd floor East Wing, Institute of Psychiatry, Psychology and Neuroscience

16 De Crespigny Park, London, SE5 8AF

E: [valeria.de\\_angel@kcl.ac.uk](mailto:valeria.de_angel@kcl.ac.uk)

## Supplementary Table 1

Supplementary table 1 – the devices and models used to measure behaviour.

| Studies                                                    | Device                                            | Model(s)                                 | Behaviour         | Sensors                                                                    |
|------------------------------------------------------------|---------------------------------------------------|------------------------------------------|-------------------|----------------------------------------------------------------------------|
| 28, 32, 36, 38, 39, 43, 44, 45, 46, 77, 84, 90, 91, 92, 97 | Actiwatch Mini Mitter Co. Inc.                    | 2, Score, Spectrum, 64                   | Sleep             | Accelerometer, Light                                                       |
|                                                            |                                                   | 1, 2, Spectrum, 64                       | Circadian Rhythm  | Accelerometer, Light                                                       |
|                                                            |                                                   | 2                                        | Physical Activity | Accelerometer, Light                                                       |
| 87,                                                        | Actillum® Actigraph                               |                                          | Sleep             | Accelerometer, light                                                       |
|                                                            |                                                   |                                          | Physical Activity | Accelerometer, Light                                                       |
| 34, 83                                                     | Actiwatch 4, Cambridge Technology Ltd             | 4                                        | Sleep             | Accelerometer, Light                                                       |
|                                                            |                                                   | 4                                        | Circadian Rhythm  | Accelerometer, Light                                                       |
|                                                            |                                                   | 4                                        | Physical Activity | Accelerometer, Light                                                       |
| 29                                                         | Actiwatch, Philips Respironics, USA               | 64, 2, L                                 | Sleep             | Accelerometer, Light                                                       |
|                                                            |                                                   | 64, 2, L                                 | Circadian Rhythm  | Accelerometer, Light                                                       |
|                                                            |                                                   | 2, L                                     | Physical Activity | Accelerometer, Light                                                       |
| 24, 25, 82, 91                                             | GENEActiv, Activinsights, UK                      |                                          | Sleep             | Accelerometer, Light, Temperature                                          |
|                                                            |                                                   |                                          | Circadian Rhythm  | Accelerometer, Light                                                       |
|                                                            |                                                   |                                          | Physical Activity | Accelerometer, Light                                                       |
| 76, 93, 95                                                 | Motionlogger, Ambulatory Monitoring, Ardsley, NY. | Basic Mini, Micro Mini, Octagonal Basic. | Sleep             | Accelerometer, Light                                                       |
|                                                            |                                                   |                                          | Circadian Rhythm  | Accelerometer, Light                                                       |
| 6                                                          | Empatica                                          | E4                                       | Sleep             | Accelerometer, Light, Electrodermal activity, Skin temperature, Heart Rate |
|                                                            |                                                   |                                          | Physical Activity | Accelerometer, Light, Electrodermal activity, Skin temperature, Heart Rate |
| 41, 85                                                     | ActiGraph Link accelerometer                      | GT9X, GT3x                               | Physical Activity | Accelerometer, Light                                                       |
| 81                                                         | Garmin                                            |                                          | Physical Activity | Gyroscope, Accelerometer, Compass                                          |
| 42                                                         | Tempatilume® (Cebrasil, Inc. Brazil)              |                                          | Circadian Rhythm  | Accelerometer, Light                                                       |
|                                                            |                                                   |                                          | Physical Activity | Accelerometer, Light                                                       |
|                                                            |                                                   |                                          | Environmental     | Light, temperature                                                         |
| 94                                                         | Pedometer                                         | StepCount SC-01                          | Physical Activity | Pedometer                                                                  |
| 5, 81                                                      | Fitbit                                            | Charge HR                                | Sleep             | Accelerometer, Light, Heart Rate                                           |
|                                                            |                                                   | Charge HR                                | Location          | GPS                                                                        |
|                                                            |                                                   | Charge HR, unknown model                 | Physical Activity | Accelerometer, Light, Heart Rate                                           |
| 96                                                         | Microsoft Band                                    | 2                                        | Physiology        | Heart Rate                                                                 |
| 5, 6, 7, 22, 31, 40, 47, 49, 50, 51, 52, 81, 89, 96        | Smartphone                                        | Android                                  | Sleep             | Light sensor, microphone, screen activity, accelerometer                   |
|                                                            |                                                   | Android                                  | Circadian Rhythm  | light sensor, microphone, screen activity, accelerometer                   |
|                                                            |                                                   | Android + iOS                            | Location          | GPS signal                                                                 |
|                                                            |                                                   | Android + iOS                            | Location          | GPS + Bluetooth                                                            |
|                                                            |                                                   | Android + iOS                            | Location          | GPS + Wifi Signal                                                          |
|                                                            |                                                   | Android + iOS                            | Location          | Screen unlock duration                                                     |
|                                                            |                                                   | Android + iOS                            | Location          | Screen unlock times                                                        |
|                                                            |                                                   | Android + iOS                            | Physical Activity | App usage                                                                  |

|  |  |               |                   |                                            |
|--|--|---------------|-------------------|--------------------------------------------|
|  |  | Android + iOS | Physical Activity | Accelerometer                              |
|  |  | Android + iOS | Physical Activity | GPS                                        |
|  |  | Android + iOS | Physical Activity | Pedometer                                  |
|  |  | Android + iOS | Socialisation     | Combination: GPS + smartphone<br>Wifi logs |
|  |  | Android + iOS | Socialisation     | Call logs                                  |
|  |  | Android + iOS | Socialisation     | SMS logs                                   |
|  |  | Android + iOS | Socialisation     | GPS                                        |
|  |  | Android + iOS | Socialisation     | Microphone                                 |
|  |  | Android       | Environmental     | Bluetooth                                  |
|  |  | Android       | Environmental     | Humidity                                   |

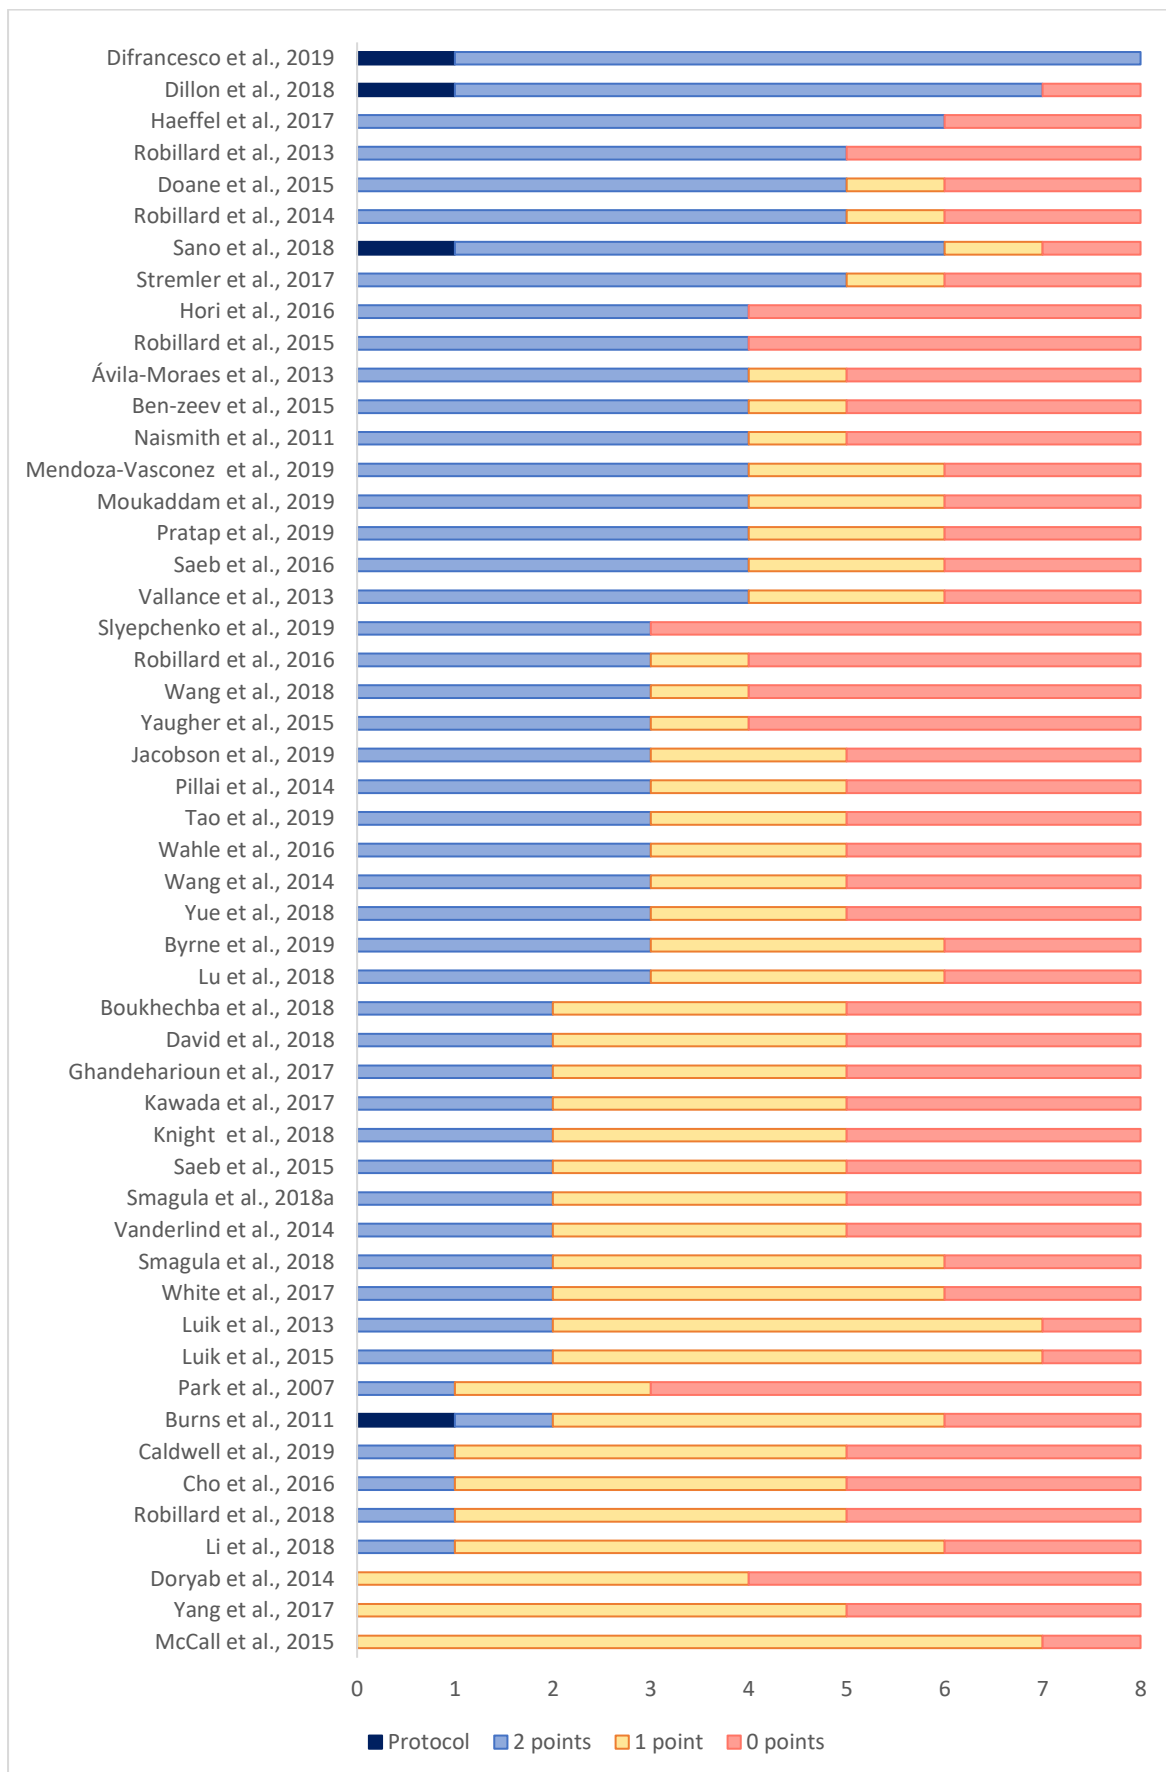

**Supplementary Figure 1 | Quality Assessment Score Distribution.** Figure showing the distribution of scores on all eight quality assessment items, including whether authors refer to a published protocol, in order of highest to lowest quality. Each row shows how many items were given a score of 2, 1 or 0 points. Presence of a protocol was scored either 1 (if present) or 0 (if absent).

## Supplementary Table 2

Supplementary table 2 – raw and percentage quality assessment scores per study. Total score was calculated out of 15.

| Field            | Reference                     | Total Score ( /15) | % score |
|------------------|-------------------------------|--------------------|---------|
| Medical          | Difrancesco et al., 2019      | 15                 | 100.0   |
| Medical          | Dillon et al., 2018           | 13                 | 86.7    |
| Medical          | Haefel et al., 2017           | 12                 | 80.0    |
| Medical          | Sano et al., 2018             | 12                 | 80.0    |
| Medical          | Doane et al., 2015            | 11                 | 73.3    |
| Medical          | Robillard et al., 2014        | 11                 | 73.3    |
| Medical          | Stremmer et al., 2017         | 11                 | 73.3    |
| Medical          | Mendoza-Vasconez et al., 2019 | 10                 | 66.7    |
| Medical          | Moukaddam et al., 2019        | 10                 | 66.7    |
| Medical          | Pratap et al., 2019           | 10                 | 66.7    |
| Medical          | Robillard et al., 2013        | 10                 | 66.7    |
| Medical          | Saeb et al., 2016             | 10                 | 66.7    |
| Medical          | Vallance et al., 2013         | 10                 | 66.7    |
| Computer Science | Ávila-Moraes et al., 2013     | 9                  | 60.0    |
| Medical          | Ben-zeev et al., 2015         | 9                  | 60.0    |
| Computer Science | Byrne et al., 2019            | 9                  | 60.0    |
| Medical          | Lu et al., 2018               | 9                  | 60.0    |
| Medical          | Luik et al., 2013             | 9                  | 60.0    |
| Medical          | Luik et al., 2015             | 9                  | 60.0    |
| Medical          | Naismith et al., 2011         | 9                  | 60.0    |
| Medical          | Hori et al., 2016             | 8                  | 53.3    |
| Medical          | Jacobson et al., 2019         | 8                  | 53.3    |
| Medical          | Pillai et al., 2014           | 8                  | 53.3    |
| Medical          | Robillard et al., 2015        | 8                  | 53.3    |
| Computer Science | Smagula et al., 2018b         | 8                  | 53.3    |
| Medical          | Tao et al., 2019              | 8                  | 53.3    |
| Medical          | Wahle et al., 2016            | 8                  | 53.3    |
| Medical          | Wang et al., 2014             | 8                  | 53.3    |
| Medical          | White et al., 2017            | 8                  | 53.3    |
| Medical          | Yue et al., 2018              | 8                  | 53.3    |
| Computer Science | Boukhechba et al., 2018       | 7                  | 46.7    |
| Medical          | Burns et al., 2011            | 7                  | 46.7    |
| Medical          | David et al., 2018            | 7                  | 46.7    |
| Medical          | Ghandeharioun et al., 2017    | 7                  | 46.7    |
| Medical          | Kawada et al., 2017           | 7                  | 46.7    |
| Medical          | Knight et al., 2018           | 7                  | 46.7    |
| Medical          | Li et al., 2018               | 7                  | 46.7    |
| Medical          | McCall et al., 2015           | 7                  | 46.7    |
| Computer Science | Robillard et al., 2016        | 7                  | 46.7    |
| Medical          | Saeb et al., 2015             | 7                  | 46.7    |
| Medical          | Smagula et al., 2018a         | 7                  | 46.7    |
| Medical          | Vanderlind et al., 2014       | 7                  | 46.7    |
| Medical          | Wang et al., 2018             | 7                  | 46.7    |
| Medical          | Yaugher et al., 2015          | 7                  | 46.7    |
| Computer Science | Caldwell et al., 2019         | 6                  | 40.0    |
| Medical          | Cho et al., 2016              | 6                  | 40.0    |
| Medical          | Robillard et al., 2018        | 6                  | 40.0    |
| Medical          | Slyepchenko et al., 2019      | 6                  | 40.0    |
| Medical          | Yang et al., 2017             | 5                  | 33.3    |
| Medical          | Doryab et al., 2014           | 4                  | 26.7    |
| Medical          | Park et al., 2007             | 4                  | 26.7    |

### Supplementary Table 3

Supplementary table 3 – Feature Descriptions for Sleep features extracted in all included studies.

| Low-Level Features         | Description                                                                                                                                                                                                                                                                            | Study-level feature examples                                                                                                     |
|----------------------------|----------------------------------------------------------------------------------------------------------------------------------------------------------------------------------------------------------------------------------------------------------------------------------------|----------------------------------------------------------------------------------------------------------------------------------|
| <b>Total Sleep Time</b>    | The amount of actually sleep time in a sleep episode; this time is equal to the total sleep episode less the awake time                                                                                                                                                                | Total Sleep Time (TST)<br>Total Sleep Duration Per Night<br>Awake Duration                                                       |
| <b>Sleep Quality</b>       | A combination of factors which relate to how much of the time that is intended for sleep is actually spent sleeping.                                                                                                                                                                   | Intradaily Variability In Sleep<br>Wake After Sleep Onset<br>Number Of Nocturnal Awakenings<br>Minutes After Wakeup              |
| <b>Sleep Efficiency</b>    | Sleep efficiency is another measure of sleep quality presented independently due to its popularity. It is the percentage of time spent asleep while in bed. It is calculated by dividing the amount of time spent asleep (in minutes) by the total amount of time in bed (in minutes). | Sleep Efficiency                                                                                                                 |
| <b>Sleep Stability</b>     | Features of variability in sleep                                                                                                                                                                                                                                                       | Sleep Start Time Variability<br>Interdaily Stability In Sleep<br>Sleep Variability Standard Deviation<br>Sleep Onset Variability |
| <b>Sleep Architecture</b>  | The basic structure of sleep                                                                                                                                                                                                                                                           | Mean Mid-Sleep Time<br>Acrophase Of Sleep<br>Mid Sleep On Free Days<br>Mean Mid-Sleep Time                                       |
| <b>Sleep Onset Latency</b> | The amount of time it takes you to go from being fully awake to sleeping                                                                                                                                                                                                               | Sleep Onset Latency (SOL)<br>Sleep Onset Latency (Women)<br>Sleep Onset Latency (Men)                                            |
| <b>Sleep Onset</b>         | The time at which sleep onset happens                                                                                                                                                                                                                                                  | Sleep Onset                                                                                                                      |
| <b>Sleep Offset</b>        | The time at which the individual awakens.                                                                                                                                                                                                                                              | Sleep Offset                                                                                                                     |
| <b>Time In Bed</b>         | Total amount of time spent in bed                                                                                                                                                                                                                                                      | Time In Bed                                                                                                                      |

### Supplementary Table 4

Supplementary table 4 – Feature Descriptions for Physical Activity features extracted in all included studies.

| Low-Level Features     | Description                                                                         | Study-level feature examples                                                                                                         |
|------------------------|-------------------------------------------------------------------------------------|--------------------------------------------------------------------------------------------------------------------------------------|
| <b>Activity Time</b>   | Time spent engaging in physical activity                                            | Summation Of All Active Periods<br>Fraction Of Time In Motion<br>Minutes Per Week Of Physical Activity<br>Average Wrist Activity/Min |
| <b>Activity Levels</b> | General levels of activity                                                          | Average 24-Hour Activity<br>Gross Motor Activity Per Day<br>Standard Deviation Motion<br>Average Motion                              |
| <b>Intensity</b>       | Activity features that differentiate between light, moderate and vigorous activity. | Minutes Of Heart Rate In Fat-Burn Zone<br>Time In Moderate-To-Vigorous Physical Activity<br>Time In Light Physical Activity          |
| <b>Speed</b>           | Movement speed                                                                      | Speed Mean<br>Speed Variance<br>Average Moving Speed                                                                                 |
| <b>Sedentary Time</b>  | Total time spent doing no activity                                                  | Sedentary Minutes<br>Time In Sedentary Behaviours<br>Stationary Time (Mean)                                                          |
| <b>Step Count</b>      | Step count                                                                          | Step Count                                                                                                                           |

## Supplementary Table 5

Supplementary table 5 – Feature Descriptions for Circadian Rhythm features extracted in all included studies.

| Low-Level Features                | Description                                                                                                                                                                                                                                       | Study-level feature examples                                                                                                                     |
|-----------------------------------|---------------------------------------------------------------------------------------------------------------------------------------------------------------------------------------------------------------------------------------------------|--------------------------------------------------------------------------------------------------------------------------------------------------|
| <b>Hour Based Activity Levels</b> | Activity levels at different times of day                                                                                                                                                                                                         | Motor activity (diurnal)<br>daytime activity levels(DALs) (am)<br>daytime activity levels(DALs) (pm)<br>mean activity during active period (day) |
| <b>Intradaily Stability</b>       | The ratio of the hour-to-hour activity variability to the overall activity variability (higher values reflect more fragmented rhythms, e.g., due to frequent daytime napping or night-time awakenings.                                            | Intradaily stability<br>Intradaily variability<br>change in intra-daily variability (IV),                                                        |
| <b>Acrophase</b>                  | peak of activity: a measure of the timing of overall high values recurring in each cycle, expressed in (negative) degrees in relation to a reference time set to 0°, with 360° equated to the period; and the period is the duration of one cycle | Acrophase                                                                                                                                        |
| <b>MESOR</b>                      | MEAN activity levels: a rhythm-adjusted mean                                                                                                                                                                                                      | MESOR                                                                                                                                            |
| <b>Amplitude</b>                  | difference between peak and troughs of activity: difference between most active time and the least active time of the day, (higher values indicate a greater RAR amplitude) a measure of the extent of predictable change within a cycle          | Relative amplitude                                                                                                                               |
| <b>Circadian Rhythmicity</b>      | The coefficient of determination (or R <sup>2</sup> ; not illustrated here), a measure reflecting the goodness of fit, was used as an indicator of circadian rhythmicity.                                                                         | Circadian Rhythmicity                                                                                                                            |
| <b>Transition Probabilities</b>   | The probability of transitioning from active to rest state or vice versa                                                                                                                                                                          | Active to Rest - day<br>Active to rest - night<br>Rest to Active - night                                                                         |
| <b>Interdaily Stability</b>       | Ratio of variability within the mean 24-hour activity profile to the overall activity variability (higher values indicate greater stability of the mean 24-hour profile across days)                                                              | Interdaily stability                                                                                                                             |
| <b>Alpha</b>                      | Relative width of the curve at the middle of the peak. Higher alpha indicates relatively narrower active periods compared to rest periods.                                                                                                        | Alpha                                                                                                                                            |
| <b>Period</b>                     | The time in between activity peaks, usually 24 hours. Shorter periods lead to behaviour occurring at an earlier clock time and long periods to later timing                                                                                       | Period                                                                                                                                           |
| <b>Beta</b>                       | Indicator of the steepness of the rise and fall of the curve, indicative of a faster transition from rest to active.                                                                                                                              | Beta                                                                                                                                             |



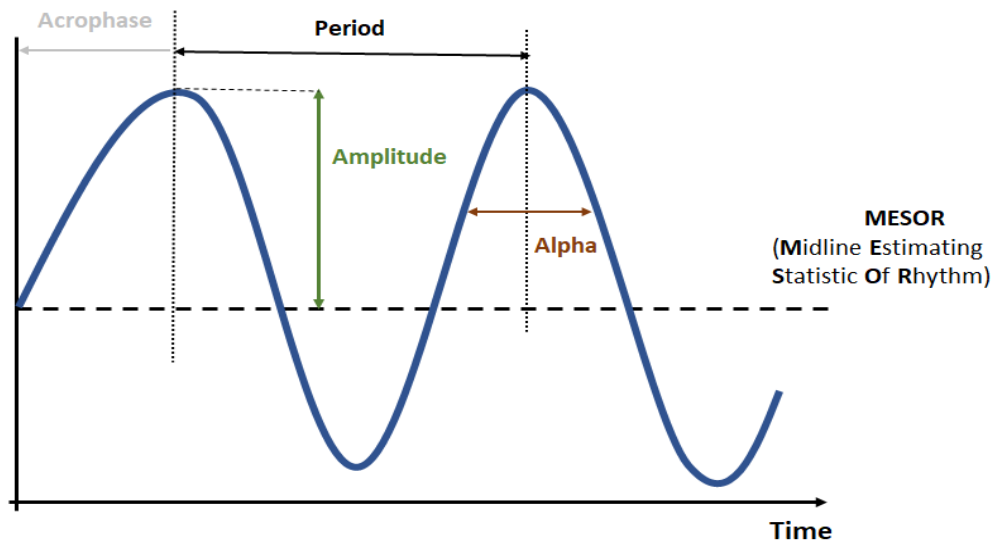

**Supplementary Figure 2 | Circadian Rhythm terms.** A graph showing a cosine wave representing the circadian curve with the period of 24 h and its terminology.

### Supplementary Table 6

Supplementary table 6 – Feature descriptions for Sociability features extracted in all included studies.

| Low-Level Features              | Description                                                                                                                   | Study-level feature examples                                                                   |
|---------------------------------|-------------------------------------------------------------------------------------------------------------------------------|------------------------------------------------------------------------------------------------|
| Frequency of Phone Interactions | Frequency of Phone Calls of Text Messages                                                                                     | Daily Call count<br>SMS count<br>Average frequency of calls per day                            |
| Call Duration                   | Call duration                                                                                                                 | Call duration                                                                                  |
| Missed Interactions             | Unreturned calls                                                                                                              | Unreturned calls<br>Missed interactions                                                        |
| Speech Duration                 | Length of detected speech                                                                                                     | Speech duration<br>Conversation duration during day<br>Change in Conversation duration (slope) |
| Socialisation By Proximity      | Detected proximity to others by nearby Bluetooth devices of speech.                                                           | Location/noise/voice<br>Socialisation by proximity and noise                                   |
| Conversation Frequency          | Number of times conversation was detected nearby                                                                              | Conversation frequency during day<br>Conversation frequency during evening                     |
| SMS Length                      | SMS length                                                                                                                    | SMS length                                                                                     |
| Unique Remote Interactions      | Total number of unique individuals with whom a participant interacted through phone calls or SMS messages on a particular day | Interaction diversity                                                                          |
| Time Spent On Messages          | Total time spent using messages                                                                                               | Total time spent using messages                                                                |

### Supplementary Table 7

Supplementary table 7 – Feature descriptions for Location features extracted in all included studies.

| Low-Level Features | Description                                                                                                                                               | Study-level feature examples                                                             |
|--------------------|-----------------------------------------------------------------------------------------------------------------------------------------------------------|------------------------------------------------------------------------------------------|
| Entropy            | The variability of time the participants spend at a certain location. High entropy translates to spending time more uniformly across different locations. | Entropy<br>Normalised Entropy                                                            |
| N of Locations     | The number of locations visited                                                                                                                           | Number of unique locations<br>Total standard deviation of location<br>Number of clusters |

|                             |                                                                                                                                                                                                          |                                                                                                                                          |
|-----------------------------|----------------------------------------------------------------------------------------------------------------------------------------------------------------------------------------------------------|------------------------------------------------------------------------------------------------------------------------------------------|
| <b>Home Stay</b>            | Amount of time spent at the location identified as Home                                                                                                                                                  | Homestay                                                                                                                                 |
| <b>Location Variance</b>    | The variability in a participant's location                                                                                                                                                              | Location Variance                                                                                                                        |
| <b>Average Moving Speed</b> | Average Moving Speed                                                                                                                                                                                     | Average Moving Speed                                                                                                                     |
| <b>Time At Location</b>     | Average amount of time spent in a particular location.                                                                                                                                                   | Average staying time per visit across the study<br>Cumulative staying time across the study<br>Time at on-campus health facilities(mean) |
| <b>Total Distance</b>       | Total Distance Travelled by a participant                                                                                                                                                                | Total Distance                                                                                                                           |
| <b>Transition Time</b>      | The percentage of time during which a participant was in a non-stationary state. This was calculated by dividing the number of GPS location samples in transition states by the total number of samples. | Transition Time                                                                                                                          |
| <b>Mobility Radius</b>      | The radius of the area within which a person moved.                                                                                                                                                      | Mobility Radius                                                                                                                          |

### Supplementary Table 8

Supplementary table 8 – Feature descriptions for Phone Use features extracted in all included studies.

| <b>Low-Level Features</b>       | <b>Description</b>                                                                                      | <b>Study-level feature examples</b>                                                                 |
|---------------------------------|---------------------------------------------------------------------------------------------------------|-----------------------------------------------------------------------------------------------------|
| <b>Unlock Duration</b>          | The amount of time a person's phone is unlocked and therefore in use. Commonly referred as screen-time. | Total phone usage duration<br>Mean phone usage duration at student accommodation                    |
| <b>Specific App Use</b>         | The types of apps used.                                                                                 | total time spent using Instagram<br>total time spent using maps<br>total time spent using photo app |
| <b>Unlock Frequency</b>         | The number of times a phone is unlocked.                                                                | phone usage frequency                                                                               |
| <b>Combination Of Phone Use</b> | Combination of smartphone use features                                                                  | combination of all smartphone use features                                                          |

### Supplementary Table 9

Supplementary table 9 – Feature descriptions for Physiology features extracted in all included studies.

| <b>Low-Level Features</b>     | <b>Description</b>                   | <b>Study-level feature examples</b>                                                                 |
|-------------------------------|--------------------------------------|-----------------------------------------------------------------------------------------------------|
| <b>Temperature</b>            | Temperature recorded from skin.      | Diurnal Peripheral temperature<br>Amplitude of temperature rhythm<br>Mean elevated temperature time |
| <b>Heart Rate</b>             | The number of heart beats per minute | Heart rate                                                                                          |
| <b>Electrodermal Activity</b> | Skin conductance                     | Electrodermal activity<br>Difference in number of skin conductance level peaks                      |

### Supplementary Table 10

Supplementary table 10 – Feature descriptions for Environmental features extracted in all included studies.

| <b>Low-Level Features</b> | <b>Description</b>     | <b>Study-level feature examples</b>                                            |
|---------------------------|------------------------|--------------------------------------------------------------------------------|
| <b>Humidity</b>           | Environmental humidity | Humidity - males<br>Humidity - females                                         |
| <b>Light</b>              | Ambient Light          | Amplitude of light intensity<br>Acrophase of light<br>Mean elevated light time |

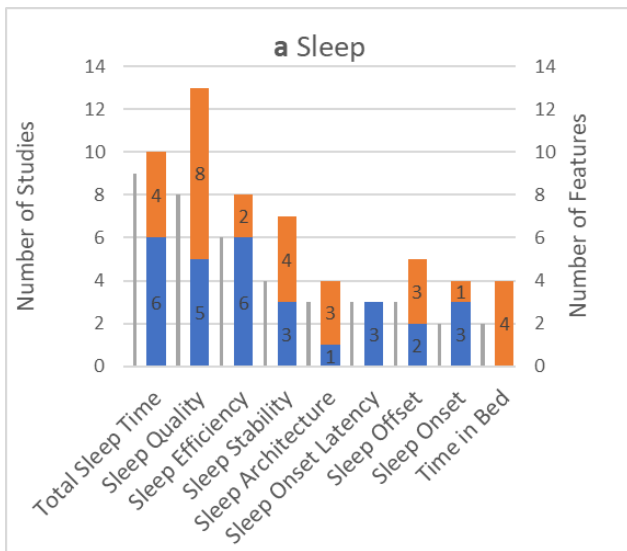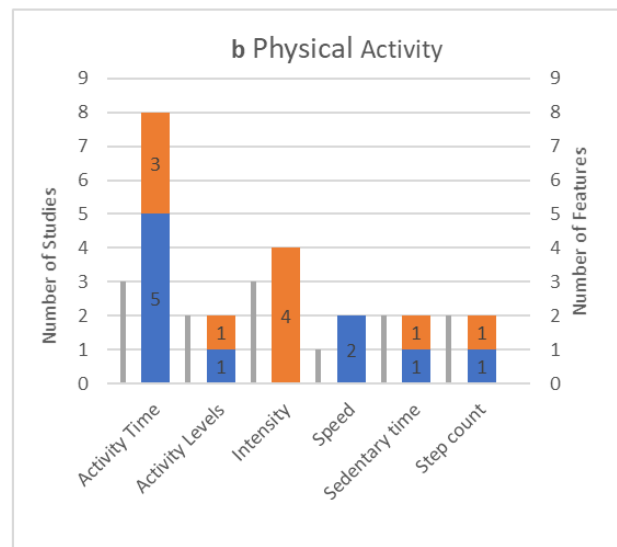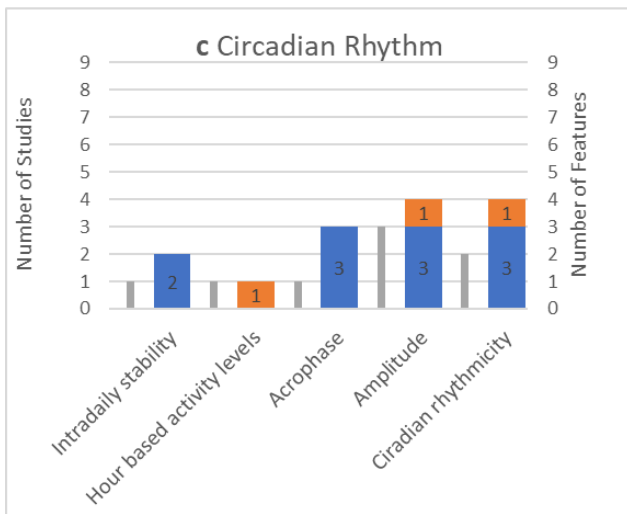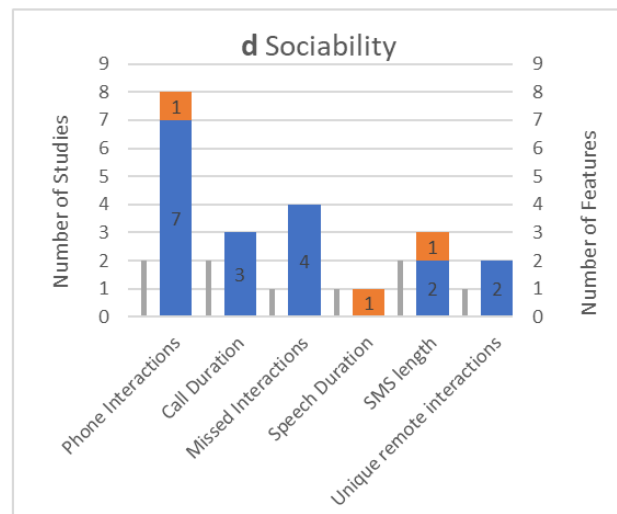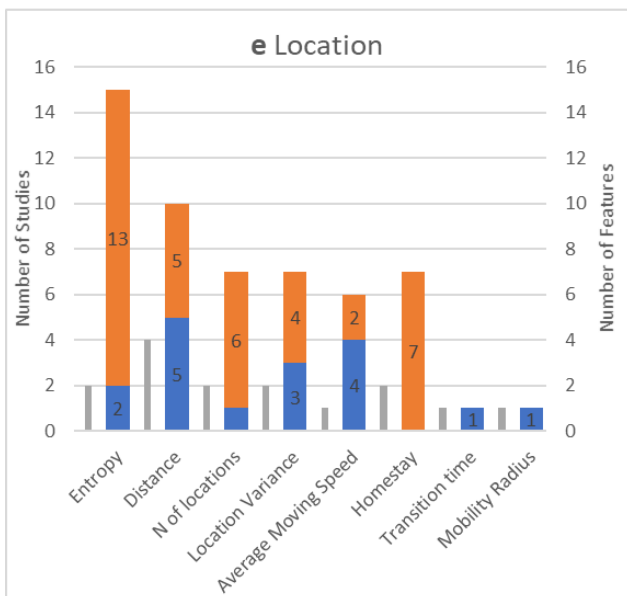

■ Non Significant Association   ■ Significant Association   ■ Number of Studies

**Supplementary Figure 3 | Sensitivity analysis.** Data synthesis for included studies scoring higher than 8 on the quality assessment scale. The number of times each feature (**a** sleep, **b** physical activity, **c** circadian rhythm, **d** sociability, and **e** location) has been reported in all included studies and their association with depression, where these associations are defined as having a below-threshold p-value (“Significant Association”), above-threshold p-value (“Non-Significant Association”), and where statistical methods have been used that do not yield p-values (“Non p-value”). Only one study looking at Phone Use scored over 8, a multiparametric study with no bivariate associations, and was therefore not included above. The graphs also show the number of studies assessing each feature.

### Supplementary Note 1: Full search strategy

The following databases were searched: 1) Pubmed, 2) Embase, PsychInfo via OVID, 3) IEEE Xplore, 4) ACM Digital library, 5) Web of science,

We included terms surrounding the following key concepts:

|                                                                  |
|------------------------------------------------------------------|
| 1. Depression, depressive disorder                               |
| 2. RMTs, sensors, technologies (Portable or wearable technology) |

|   | Keywords                                                                                                                                                                                                                                                                                                         | Ti/Ab                                                                                                                                              |
|---|------------------------------------------------------------------------------------------------------------------------------------------------------------------------------------------------------------------------------------------------------------------------------------------------------------------|----------------------------------------------------------------------------------------------------------------------------------------------------|
| 1 | mood disorder; affective disorder; depression; depressive mood symptoms, mental health, depress*, Unipolar affective disorder, mental disorders                                                                                                                                                                  | remote emotional health monitoring system, mood,                                                                                                   |
| 2 | "Objective Behavioral Features", objective features; sensor data; "smart phone"; wearable devices; wearable, smartphone, app, apps, accelerometer, pedometer, actigraphy, motor activity, Psychomotor activity, Acceleration, Heart rate, heart rate and movement sensor, "digital biomarker", digital phenotype | activity measurement, wrist-worn, remote, Psychomotor activity, objectively measured activity parameters, Electronic monitoring, objective measure |

#### 1) Pubmed search:

|     |                                                                                                                                                                                                                                                                                                                                                                                                                                                                                                                                                 |
|-----|-------------------------------------------------------------------------------------------------------------------------------------------------------------------------------------------------------------------------------------------------------------------------------------------------------------------------------------------------------------------------------------------------------------------------------------------------------------------------------------------------------------------------------------------------|
|     | Depressive Disorder[Mesh] OR Major Depressive Disorder[Mesh] OR Depression[Mesh] OR depressi*[Title/Abstract] OR "affective disorder"[Title/Abstract] OR "mood disorder"[Title/Abstract]                                                                                                                                                                                                                                                                                                                                                        |
| AND | Remote Sensing Technology [MeSH] "digital"[Title/Abstract] OR smartphone[Title/Abstract] OR mobile[Title/Abstract] OR wearable[Title/Abstract] OR "objective measure"[Title/Abstract] OR "sensor data" OR "wearable devices" OR "smart phone" OR app OR apps OR "activity measure" OR acceleromet* OR pedomet* OR actigraph* OR "psychomotor activity" OR "remote monitoring" OR "GPS" OR "global positioning system" OR "mobile sensor" OR "RMT" OR "remote measurement technologies" OR mHealth OR "digital biomarker" OR "digital phenotype" |

Limit to 2007

#### 2) OVID: PsychInfo and EMBASE

[exp Major Depression/](#)

[major depression/ or affective disorder/ or depressive disorder.mp.](#)

[\("depressive mood" or "depressed mood" or "depressive symptoms" or "depressed symptoms" or "affective symptoms" or "mood disorder" or depression\).ti,ab.](#)

[\(digital or smartphone or mobile or wearable or objective measure\).ti,ab.](#)

[\("sensor data" or "wearable device" or "smart phone" or smartphone or accelerometer or pedometer or actigraphy or "psychomotor activity" or "remote monitoring" or "GPS" or "global positioning system" or "mobile sensor" or "RMT" or "remote measurement technologies" or mhealth or "machine learning" or app or apps or "activity measure" or "digital biomarker"\).mp.](#)

limit to yr="2007 -Current"

|                                                                                                                                                                                                                                                                                                                                                                                                             |        |
|-------------------------------------------------------------------------------------------------------------------------------------------------------------------------------------------------------------------------------------------------------------------------------------------------------------------------------------------------------------------------------------------------------------|--------|
| major depression/ or affective disorder/ or depressive disorder.mp.                                                                                                                                                                                                                                                                                                                                         | 262002 |
| 1                                                                                                                                                                                                                                                                                                                                                                                                           |        |
| 2 ("depressive mood" or "depressed mood" or "depressive symptoms" or "depressed symptoms" or "affective symptoms" or "mood disorder" or depression).ti,ab.                                                                                                                                                                                                                                                  | 716408 |
| 3 1 or 2                                                                                                                                                                                                                                                                                                                                                                                                    | 795172 |
| 4 (digital or mobile or wearable or objective measure).ti,ab.                                                                                                                                                                                                                                                                                                                                               | 318272 |
| 5 ("sensor data" or "remote sensing technology" or "wearable device" or "smart phone" or smartphone or accelerometer or pedometer or actigraphy or "psychomotor activity" or "remote monitoring" or "GPS" or "global positioning system" or "mobile sensor" or "RMT" or "remote measurement technologies" or mhealth or "machine learning" or app or apps or "activity measure" or "digital biomarker").mp. | 187037 |
| 6 4 or 5                                                                                                                                                                                                                                                                                                                                                                                                    | 485984 |
| 7 3 and 6                                                                                                                                                                                                                                                                                                                                                                                                   | 10688  |
| 8 limit 7 to yr="2016 -Current"                                                                                                                                                                                                                                                                                                                                                                             | 4635   |
| 9 limit 7 to yr="2007 - 2015"                                                                                                                                                                                                                                                                                                                                                                               | 4321   |
| 10 remove duplicates from 9                                                                                                                                                                                                                                                                                                                                                                                 | 3526   |
| 11 remove duplicates from 8                                                                                                                                                                                                                                                                                                                                                                                 | 3929   |
| 12 10 or 11                                                                                                                                                                                                                                                                                                                                                                                                 | 7455   |

### 3) IEEE Xplore:

("remote sensing technology" OR "psychomotor activity" OR "RMT" OR "mhealth" OR "accelerometer" OR "pedometer" OR "actigraphy" OR "sensor data" OR "sensing technology" OR "GPS" or "global positioning system" OR "mobile sensor" OR "smartphone" OR "mobile" OR "wearable" OR "smart phone" OR "app" OR "apps" OR "digital biomarker\*" OR "digital phenotype") AND ("depression" OR "depressed mood" OR "depressive symptoms" OR "affective disorder" OR "mental health" OR "mood disorder" OR "mood")

Limit to 2007 onwards

### 4) ACM Digital library,

NOTE: adding "depressive mood" and/or "depressed symptoms" does not improve the search

"depressive mood" or "depressed mood" or "depressive symptoms" or "depressed symptoms" or "affective symptoms" or "mood disorder" or depression or "major depression" or "affective disorder" or "depressive disorder"

AND

"remote sensing technology" or "sensor data" or "wearable device" or "smart phone" or "smartphone" accelerometer or pedometer or actigraphy or "psychomotor activity" or "remote monitoring" or "GPS" or "global positioning system" or "mobile sensor" or "RMT" or "remote measurement technologies" or mhealth

"filter": {"publicationYear":{"gte":2007 }},

{owners.owner=GUIDE}

## 5) Web of science,

- # 9 [3,689](#) #8 *Indexes=SCI-EXPANDED, SSCI, A&HCI, CPCI-S, CPCI-SSH, ESCI Timespan=2007-2019*
- # 8 [4,305](#) #7 AND #4 *Indexes=SCI-EXPANDED, SSCI, A&HCI, CPCI-S, CPCI-SSH, ESCI Timespan=1900-2019*
- # 7 [327,872](#) #6 OR #5 *Indexes=SCI-EXPANDED, SSCI, A&HCI, CPCI-S, CPCI-SSH, ESCI Timespan=1900-2019*
- # 6 [147,948](#) TI=(wearable OR mobile) *Indexes=SCI-EXPANDED, SSCI, A&HCI, CPCI-S, CPCI-SSH, ESCI Timespan=1900-2019*
- # 5 [193,432](#) TS=("remote sensing technology" OR "sensor data" OR "wearable device" OR "smart phone" OR smartphone OR accelerometer OR pedometer or actigraphy OR "psychomotor activity" OR "remote monitoring" OR "GPS" OR "global positioning system" OR "mobile sensor\*" OR "sensing technologies" OR "RMT" OR "remote measurement technologies" OR mhealth OR "digital biomarker\*" OR "digital phenotype\*")  
*Indexes=SCI-EXPANDED, SSCI, A&HCI, CPCI-S, CPCI-SSH, ESCI Timespan=1900-2019*
- # 4 [542,297](#) #3 OR #2 OR #1  
*Indexes=SCI-EXPANDED, SSCI, A&HCI, CPCI-S, CPCI-SSH, ESCI Timespan=1900-2019*
- # 3 [16,431](#) TS=("affective disorder" OR "mood disorder")  
*Indexes=SCI-EXPANDED, SSCI, A&HCI, CPCI-S, CPCI-SSH, ESCI Timespan=1900-2019*
- # 2 [224,301](#) TI=(depress\* OR "affective disorder" OR mood)  
*Indexes=SCI-EXPANDED, SSCI, A&HCI, CPCI-S, CPCI-SSH, ESCI Timespan=1900-2019*
- # 1 [492,570](#) TS=(Depressive Disorder OR Major Depressive Disorder OR Depression)  
*Indexes=SCI-EXPANDED, SSCI, A&HCI, CPCI-S, CPCI-SSH, ESCI Timespan=1900-2019*

## Supplementary Table 11

Supplementary table 11 – Study quality assessment criteria, item names and scoring criteria.

|   | ITEM CRITERIA                                                            | ITEM DESCRIPTION AND SCORING                                                                                                                                                                                                                                                                            |
|---|--------------------------------------------------------------------------|---------------------------------------------------------------------------------------------------------------------------------------------------------------------------------------------------------------------------------------------------------------------------------------------------------|
| 1 | <b>Protocol Published?</b><br>[Y, N]                                     | Is a published protocol mentioned? 1= Yes, 0 = No                                                                                                                                                                                                                                                       |
| 2 | <b>Definition of Outcomes (Clinical outcomes and Objective Features)</b> | 2. clear and appropriate definition of outcomes (depression and objective measures). 1. unclear or incomplete 0. none reported                                                                                                                                                                          |
| 3 | <b>Evidence of Selective reporting (data measured but not reported)</b>  | 2. analysed data matches study objectives and post hoc analyses clearly defined as such 1. some variables measured not mentioned/ reported in results. 0. Significant results not defined at the outset nor in line with study objectives.                                                              |
| 4 | <b>Sample Description and Eligibility Definition</b>                     | 2. Gives well-defined eligibility criteria, and the sources and methods of selection of participants. 1. Eligibility criteria incomplete or unclear, or clinical-based inclusion of depression defined by self report (and not assessed by clinician). 0. no mention of sampling strategy / eligibility |
| 5 | <b>Statistical Control for Confounding and/or Multiple Comparisons</b>   | 2. clear and appropriate . 1. unclear or incomplete 0. none reported                                                                                                                                                                                                                                    |
| 6 | <b>Missing data (Report and management)</b>                              | 2. clear and appropriate . 1. unclear or incomplete 0. none reported                                                                                                                                                                                                                                    |
| 7 | <b>Representativeness</b>                                                | 2. sample representative of population of interest, 1. potential selection/sampling bias, 0. sample largely different to the populations it aims to study.                                                                                                                                              |
| 8 | <b>Justification of sample size</b>                                      | 2. clear and appropriate justification of sample size. 1. unclear or incomplete explanation for sample size. 0. none reported                                                                                                                                                                           |
